# Supplementary material
Source: PubMed Central journal article supplement (PMC6895419)
Supplement: NIHMS1536030-supplement-Supplementary_tables.pdf [file NIHMS1536030-supplement-Supplementary_tables.pdf]

Supplementary Table 1.

p-values for each experimental condition as determined by two-tailed T-test.

| Figure 3F                       | Standard MO + $\beta$ -gal | Dyrk1a MO + $\beta$ -gal | Dyrk1a MO + WT <i>DYRK1A</i> | Dyrk1a MO + <i>DYRK1A R205*</i> |
|---------------------------------|----------------------------|--------------------------|------------------------------|---------------------------------|
| <i>Xenopus</i> embryo (n)       | 166                        | 125                      | 140                          | 94                              |
| Standard MO + $\beta$ -gal      | 1                          | 3.42E-08                 | 0.0008                       | 5.98E-07                        |
| Dyrk1a MO + $\beta$ -gal        |                            | 1                        | 0.0051                       | 0.5867                          |
| Dyrk1a MO + WT <i>DYRK1A</i>    |                            |                          | 1                            | 0.0055                          |
| Dyrk1a MO + <i>DYRK1A R205*</i> |                            |                          |                              | 1                               |

Supplementary Table 2.

p-values for each experimental condition as determined by two-tailed T-test.

| Figure 3G                       | Standard MO + $\beta$ -gal | Dyrk1a MO + $\beta$ -gal | Dyrk1a MO + WT <i>DYRK1A</i> | Dyrk1a MO + <i>DYRK1A L245R</i> |
|---------------------------------|----------------------------|--------------------------|------------------------------|---------------------------------|
| <i>Xenopus</i> embryo (n)       | 75                         | 80                       | 57                           | 74                              |
| Standard MO + $\beta$ -gal      | 1                          | 0.0006                   | 0.1449                       | 0.0003                          |
| Dyrk1a MO + $\beta$ -gal        |                            | 1                        | 0.0649                       | 0.7735                          |
| Dyrk1a MO + WT <i>DYRK1A</i>    |                            |                          | 1                            | 0.0457                          |
| Dyrk1a MO + <i>DYRK1A L245R</i> |                            |                          |                              | 1                               |

Supplementary Table 3.

*Xenopus* embryos used for edema experiment.

| Figure 3J                 | Standard MO | Dyrk1a MO |
|---------------------------|-------------|-----------|
| <i>Xenopus</i> embryo (n) | 97          | 114       |
| Edema (n)                 | 2           | 45        |
| 2 abnormal kidneys (n)    | 0           | 31        |
| 1 abnormal kidney (n)     | 1           | 14        |
